# Supplementary material
Source: Springer Nature journal article supplement (https://www.springermedizin.de/resource/supplementary/13054_2012_999_MOESM5_ESM.pdf/9709812)

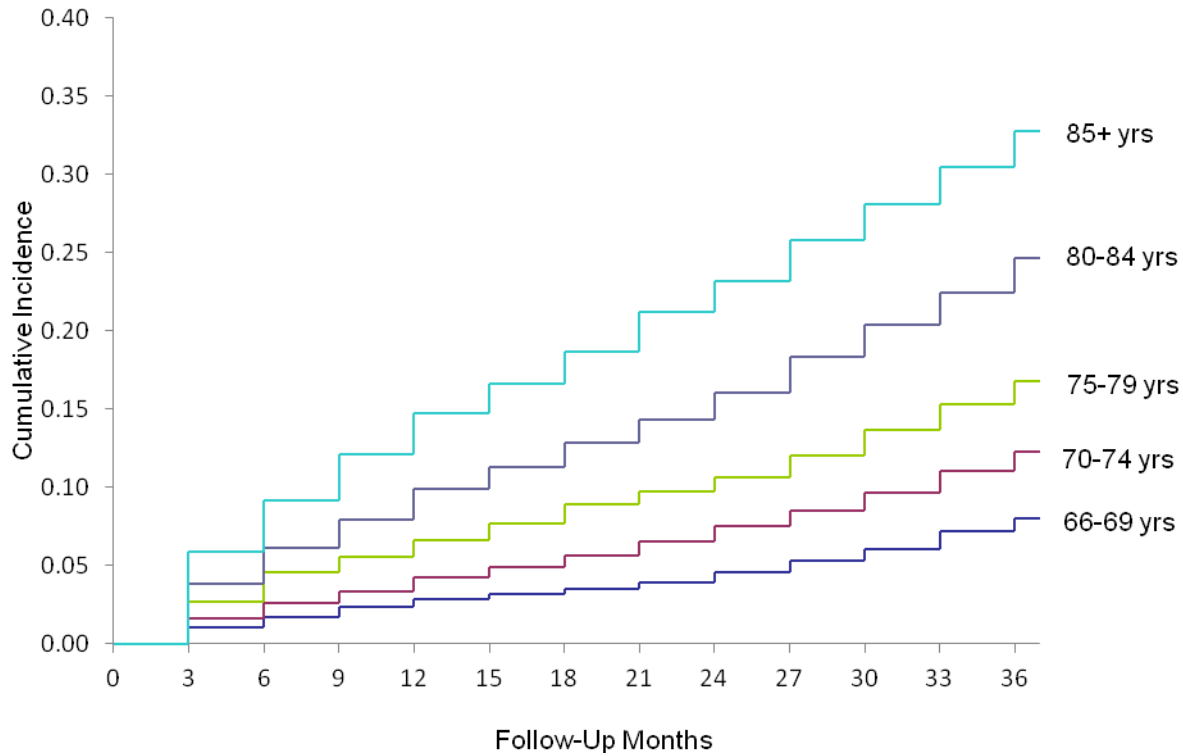

Months

**at risk  
(alive without  
dementia)**

|       | 3    | 6    | 9    | 12   | 15   | 18   | 21   | 24   | 27   | 30   | 33   | 36   |
|-------|------|------|------|------|------|------|------|------|------|------|------|------|
| 66-69 | 4589 | 4367 | 4210 | 4093 | 3983 | 3901 | 3813 | 3740 | 3656 | 3565 | 3472 | 3373 |
| 70-74 | 6132 | 5805 | 5571 | 5405 | 5244 | 5073 | 4926 | 4788 | 4657 | 4521 | 4381 | 4221 |
| 75-79 | 6193 | 5769 | 5507 | 5291 | 5110 | 4933 | 4763 | 4625 | 4479 | 4321 | 4155 | 3975 |
| 80-84 | 5060 | 4633 | 4361 | 4169 | 3983 | 3804 | 3627 | 3460 | 3293 | 3090 | 2909 | 2754 |
| 85+   | 3394 | 2960 | 2718 | 2519 | 2362 | 2201 | 2045 | 1904 | 1783 | 1632 | 1507 | 1390 |

Supplement: MOESM5 [file 9709812]
